# Supplementary material
Source: PubMed Central journal article supplement (PMC4958236)
Supplement: AAC.02810-15_zac008165403so1.pdf [file AAC.02810-15_zac008165403so1.pdf]

**TABLE S1.** The effect of amphotericin B on the metabolic activity of *C. neoformans* and *C. gattii*.

| Species detail        |               | Drug response        |                              |            |            |            |            |            |            |             |
|-----------------------|---------------|----------------------|------------------------------|------------|------------|------------|------------|------------|------------|-------------|
| Strain name           | Strain number | Non-treated cells    | Amphotericin B-treated cells |            |            |            |            |            |            |             |
|                       |               | OD <sub>562 nm</sub> | 16 µg/ml                     | 8 µg/ml    | 4 µg/ml    | 2 µg/ml    | 1 µg/ml    | 0.5 µg/ml  | 0.25 µg/ml | 0.125 µg/ml |
|                       |               |                      | %GR                          | %GR        | %GR        | %GR        | %GR        | %GR        | %GR        | %GR         |
| <i>Cr. neoformans</i> | LMPE 028      | 0.393 (0.014)        | 95 (0.005)                   | 84 (0.011) | 73 (0.021) | 66 (0.014) | 56(0.014)  | 46 (0.007) | 37 (0.014) | 26 (0.007)  |
| <i>Cr. neoformans</i> | LMPE 030      | 0.415 (0.025)        | 96 (0.012)                   | 84 (0.050) | 74 (0.007) | 64 (0.007) | 55 (0.009) | 47 (0.017) | 38 (0.009) | 27 (0.017)  |
| <i>Cr. neoformans</i> | LMPE 043      | 0.405 (0.015)        | 95 (0.040)                   | 83 (0.015) | 72 (0.005) | 63 (0.018) | 55 (0.012) | 44 (0.014) | 37 (0.014) | 24 (0.014)  |
| <i>Cr. neoformans</i> | LMPE 046      | 0.403 (0.024)        | 98 (0.083)                   | 86 (0.012) | 77 (0.009) | 68 (0.009) | 59 (0.007) | 48 (0.005) | 39 (0.047) | 29 (0.005)  |
| <i>Cr. neoformans</i> | LMPE 047      | 0.398 (0.015)        | 96 (0.049)                   | 85 (0.051) | 76 (0.012) | 66 (0.018) | 56(0.014)  | 47 (0.014) | 38 (0.014) | 27 (0.015)  |
| <i>Cr. gattii</i>     | LMPE 045      | 0.403 (0.016)        | 92 (0.016)                   | 80 (0.015) | 69 (0.013) | 61 (0.014) | 52(0.013)  | 42 (0.005) | 33 (0.005) | 22 (0.020)  |
| <i>Cr. gattii</i>     | LMPE 048      | 0.399 (0.016)        | 95 (0.008)                   | 82 (0.021) | 75 (0.008) | 65 (0.009) | 56 (0.018) | 43 (0.016) | 36 (0.016) | 25 (0.033)  |
| <i>Cr. gattii</i>     | LMPE 052      | 0.386 (0.012)        | 94 (0.013)                   | 79 (0.014) | 71 (0.020) | 64 (0.013) | 53 (0.014) | 41 (0.012) | 34 (0.013) | 21 (0.012)  |
| <i>Cr. gattii</i>     | LMPE 054      | 0.409 (0.016)        | 93 (0.008)                   | 81 (0.008) | 70 (0.011) | 62 (0.014) | 54 (0.024) | 43 (0.006) | 32 (0.050) | 23 (0.006)  |
| <i>Cr. gattii</i>     | LMPE 070      | 0.389 (0.014)        | 91 (0.019)                   | 80 (0.019) | 70 (0.009) | 60 (0.009) | 52 (0.007) | 42 (0.015) | 32 (0.009) | 22 (0.015)  |

%GR = % growth reduction (100% - (OD of treated cells/OD of non-treated cells)\*100%). Values represent mean values of three biological replicates and values in brackets represent the standard deviation.

**TABLE S2.** The effect of fluconazole on the metabolic activity of *C. neoformans* and *C. gattii*.

| Species detail        |               | Non-treated cells    | Drug response             |            |            |            |            |            |            |            |
|-----------------------|---------------|----------------------|---------------------------|------------|------------|------------|------------|------------|------------|------------|
| Strain name           | Strain number |                      | Fluconazole-treated cells |            |            |            |            |            |            |            |
|                       |               |                      | 128 µg/ml                 | 64 µg/ml   | 32 µg/ml   | 16 µg/ml   | 8 µg/ml    | 4 µg/ml    | 2 µg/ml    | 1 µg/ml    |
|                       |               | OD <sub>562 nm</sub> | %GR                       | %GR        | %GR        | %GR        | %GR        | %GR        | %GR        | %GR        |
| <i>Cr. neoformans</i> | LMPE 028      | 0.393 (0.014)        | 88 (0.009)                | 82 (0.014) | 71 (0.015) | 62 (0.014) | 55 (0.019) | 44(0.006)  | 41 (0.022) | 37 (0.007) |
| <i>Cr. neoformans</i> | LMPE 030      | 0.415 (0.025)        | 87 (0.012)                | 81 (0.022) | 74 (0.007) | 64 (0.009) | 54 (0.007) | 45 (0.009) | 42 (0.017) | 38 (0.019) |
| <i>Cr. neoformans</i> | LMPE 043      | 0.405 (0.015)        | 90 (0.050)                | 83 (0.021) | 70 (0.013) | 61 (0.021) | 55 (0.005) | 45 (0.031) | 42 (0.014) | 37 (0.031) |
| <i>Cr. neoformans</i> | LMPE 046      | 0.403 (0.024)        | 91 (0.006)                | 85 (0.006) | 76 (0.008) | 66 (0.017) | 57 (0.013) | 47 (0.013) | 44 (0.011) | 39 (0.007) |
| <i>Cr. neoformans</i> | LMPE 047      | 0.398 (0.015)        | 89 (0.019)                | 84 (0.017) | 74 (0.014) | 65 (0.041) | 56 (0.015) | 45 (0.014) | 43 (0.009) | 38 (0.005) |
| <i>Cr. gattii</i>     | LMPE 045      | 0.403 (0.016)        | 84 (0.007)                | 80 (0.009) | 70 (0.013) | 60 (0.009) | 52 (0.013) | 44 (0.007) | 40 (0.575) | 35 (0.013) |
| <i>Cr. gattii</i>     | LMPE 048      | 0.399 (0.016)        | 89 (0.006)                | 82 (0.012) | 73 (0.008) | 62 (0.008) | 55 (0.008) | 46 (0.016) | 43 (0.063) | 36 (0.015) |
| <i>Cr. gattii</i>     | LMPE 052      | 0.386 (0.012)        | 86 (0.014)                | 79 (0.017) | 68 (0.015) | 59 (0.014) | 53 (0.010) | 43 (0.014) | 41 (0.042) | 35 (0.016) |
| <i>Cr. gattii</i>     | LMPE 054      | 0.409 (0.016)        | 85 (0.012)                | 81 (0.008) | 70 (0.009) | 61 (0.008) | 50 (0.021) | 44 (0.008) | 41 (0.036) | 34 (0.030) |
| <i>Cr. gattii</i>     | LMPE 070      | 0.389 (0.014)        | 84 (0.009)                | 80 (0.009) | 70 (0.019) | 60 (0.019) | 50 (0.009) | 44 (0.041) | 42 (0.011) | 35 (0.021) |

%GR = % growth reduction (100% - (OD of treated cells/OD of non-treated cells)\*100%). Values represent mean values of three biological replicates and values in brackets represent the standard deviation.

**TABLE S3.** Characterisation of cell size following drug treatment. To determine the cell size, the cell diameter of a 100 cells was measured per SEM micrograph, in which a micrograph represented a different position on the SEM stub. In total 10 positions were considered.

| <b>Cell size characterisation</b> |                           |                        |
|-----------------------------------|---------------------------|------------------------|
| <b>Drug</b>                       |                           | <b>Effect on cells</b> |
| <b>Cell treatment</b>             | <b>Drug concentration</b> | <b>Cell diameter</b>   |
| <b>Non-treated cells</b>          | 0 µg/ml                   | 3.96 µm (+/- 0.08)     |
| <b>Aspirin-treated cells</b>      | 180 µg/ml                 | 2.90 µm (+/- 0.07)     |
| Ibuprofen-treated cells           | 206 µg/ml                 | 3.12 µm (+/- 0.08).    |

$p < 0.05$  (non-treated cells and aspirin-treated cells) and  $p < 0.05$  (non-treated cells and ibuprofen-treated cells).
